# Supplementary material for: Leadership and Characteristics of Nonprofit Mental Health Peer-Run Organizations Nationwide
Source: Atypon-hosted journal article supplement (doi:10.1176/appi.ps.201400080), 2015-02-02
Supplement: appi.ps.201400080.ds001.pdf [file appi.ps.201400080.ds001.pdf]

## Tables

Table 1. Vision and Mission

| Variable                                             | Total<br>(N=380) |    | Peer-controlled<br>(N=190) |    | Peer-directed<br>N=(190) |    | $\chi^2$ | df     | p     |
|------------------------------------------------------|------------------|----|----------------------------|----|--------------------------|----|----------|--------|-------|
|                                                      | N                | %  | N                          | %  | N                        | %  |          |        |       |
| Majority of members involved in decision-making      | 261              | 69 | 146                        | 77 | 115                      | 61 | 11.9     | 3, 378 | <.001 |
| View of organization in system                       | --               | -- | --                         | -- | --                       | -- | --       | --     | --    |
| Addition                                             | 117              | 31 | 54                         | 29 | 63                       | 34 | .94      | 3, 375 | .37   |
| Alternative                                          | 22               | 6  | 17                         | 19 | 5                        | 3  | 7.02     | 3, 375 | <.01  |
| Some supports alternatives/Some additions            | 226              | 60 | 110                        | 59 | 116                      | 62 | .32      | 3, 375 | .60   |
| No opinion                                           | 10               | 3  | 8                          | 2  | 2                        | 7  | .42      | 3, 375 | .52   |
| How peer-operated services should be used            | --               | -- | --                         | -- | --                       | -- | --       | --     | --    |
| Only use peer-operated                               | 3                | 1  | 3                          | 2  | 0                        | 0  | 3.04     | 4, 373 | .12   |
| Mostly use peer-operated                             | 83               | 22 | 47                         | 25 | 36                       | 19 | 1.95     | 4, 373 | .16   |
| Use peer-operated and traditional services equally   | 251              | 67 | 111                        | 60 | 140                      | 75 | 9.77     | 4, 373 | <.01  |
| Mostly use traditional services                      | 6                | 2  | 4                          | 2  | 2                        | 1  | .69      | 4, 373 | .45   |
| Only use traditional services                        | 0                | 0  | 0                          | 0  | 0                        | 0  | --       | 4, 373 | --    |
| No opinion                                           | 30               | 8  | 21                         | 11 | 9                        | 5  | 5.29     | 4, 373 | <.05  |
| Report that funding sources ask to compromise values | 70               | 18 | 41                         | 22 | 29                       | 15 | 2.6      | 1, 379 | .11   |

Table 2. Leadership

| Variable                                           | Total<br>(N=380) |           | Peer-controlled<br>(N=190) |           | Peer-directed<br>N=(190) |           | $\chi^2$ | df        | p        |
|----------------------------------------------------|------------------|-----------|----------------------------|-----------|--------------------------|-----------|----------|-----------|----------|
|                                                    | N                | %         | N                          | %         | N                        | %         |          |           |          |
| Incorporated non-profit                            | 313              | 82        | 147                        | 77        | 166                      | 87        | 7.22     | 2, 380    | <.05     |
| Leadership training offered                        | 230              | 62        | 119                        | 64        | 111                      | 60        | .52      | 1, 370    | .47      |
| Director self-identification as a family member... | --               | --        | --                         | --        | --                       | --        | --       | --        | --       |
| Of an adult consumer                               | 83               | 22        | 40                         | 21        | 43                       | 23        | .18      | 1, 376    | .70      |
| Of a child/youth                                   | 51               | 14        | 24                         | 13        | 27                       | 14        | .24      | 1, 376    | .62      |
| Director tenure at current organization            | --               | --        | --                         | --        | --                       | --        | --       | --        | --       |
| Less than one year                                 | 37               | 10        | 19                         | 10        | 18                       | 10        | .02      | 4, 374    | .89      |
| One to five years                                  | 168              | 45        | 85                         | 45        | 83                       | 45        | .01      | 4, 374    | .91      |
| More than five years, but less than ten            | 70               | 19        | 34                         | 18        | 36                       | 19        | .09      | 4, 374    | .75      |
| Ten or more years                                  | 94               | 25        | 47                         | 25        | 47                       | 25        | .00      | 4, 374    | .95      |
| Director duration of being a peer support provider | --               | --        | --                         | --        | --                       | --        | --       | --        | --       |
| Less than one year                                 | 12               | 3         | 8                          | 4         | 4                        | 2         | 1.42     | 4, 372    | .23      |
| One to five years                                  | 109              | 29        | 49                         | 26        | 60                       | 32        | 1.41     | 4, 372    | .23      |
| More than five years, but less than ten            | 67               | 18        | 35                         | 19        | 32                       | 17        | .21      | 4, 372    | .65      |
| Ten or more years                                  | 176              | 47        | 87                         | 47        | 89                       | 48        | .01      | 4, 372    | .91      |
|                                                    | <b>Mean</b>      | <b>SD</b> | <b>Mean</b>                | <b>SD</b> | <b>Mean</b>              | <b>SD</b> | <b>t</b> | <b>df</b> | <b>p</b> |
| Years in operation                                 | 15               | 11        | 14                         | 9         | 17                       | 13        | 2.75     | 363       | <.01     |
| Mean number of paid staff                          | 12               | 39        | 7                          | 10        | 18                       | 54        | 2.78     | 374       | <.001    |
| Median number of paid staff                        | 4                |           | 3                          |           | 7                        |           | 4.99     |           | <.001    |
| Mean number of volunteers                          | 15               | 52        | 18                         | 70        | 12                       | 23        | -1.07    | 377       | .28      |
| Median number of volunteers                        | 5                |           | 6                          |           | 5                        |           | -1.083   |           | .28      |

| Variable                                          | Total (N=380) |    | Peer-controlled (N=190) |      | Peer-directed N=(190) |       |      |     |      |
|---------------------------------------------------|---------------|----|-------------------------|------|-----------------------|-------|------|-----|------|
|                                                   |               |    |                         |      |                       |       |      |     |      |
| Difference in mean number of staff vs. volunteers | -3.4          | 65 | -11.86                  | 7.16 | 4.99                  | 57.55 | 2.54 | 373 | <.05 |
| Trained staff and volunteers                      | --            | -- | --                      | --   | --                    | --    | --   | --  | --   |
| Peer group facilitator                            | 5             | 8  | 4                       | 7    | 6                     | 9     | 1.82 | 377 | .07  |
| Certified Peer Specialist                         | 5             | 15 | 4                       | 19   | 5                     | 10    | .33  | 375 | .74  |
| WRAP facilitator                                  | 3             | 5  | 2                       | 3    | 3                     | 7     | 2.95 | 377 | <.01 |
| Recovery mentor                                   | 2             | 5  | 2                       | 5    | 3                     | 8     | 1.43 | 377 | .15  |
| Warmline support                                  | 2             | 6  | 2                       | 7    | 2                     | 4     | -.31 | 377 | .76  |
| Intentional Peer Support (IPS)                    | 2             | 6  | 2                       | 7    | 2                     | 4     | -.75 | 376 | .45  |
| Peer wellness coach                               | 1             | 4  | 1                       | 2    | 2                     | 5     | 2.04 | 376 | <.05 |
| Peer case manager                                 | 1             | 3  | 0                       | 1    | 1                     | 4     | 2.24 | 376 | <.05 |
| Peer bridger                                      | 0             | 2  | 0                       | 1    | 0                     | 3     | .95  | 377 | .34  |

**Table 3 . Outreach**

| Variable                                             | Total (N=380) |      | Peer-controlled (N=190) |      | Peer-directed N=(190) |      | $\chi^2$ | df     | p    |
|------------------------------------------------------|---------------|------|-------------------------|------|-----------------------|------|----------|--------|------|
|                                                      | N             | %    | N                       | %    | N                     | %    |          |        |      |
| Affiliated with a statewide or national organization | 223           | 59   | 110                     | 58   | 113                   | 60   | .14      | 1, 379 | .71  |
| Sufficiently connected to other peer supports        | 259           | 69   | 119                     | 64   | 140                   | 75   | 5.21     | 1, 373 | <.05 |
| Public outreach                                      | --            | --   | --                      | --   | --                    | --   | --       | --     | --   |
| Website                                              | 265           | 70   | 121                     | 64   | 144                   | 76   | 6.60     | 1, 380 | <.01 |
| List-serve                                           | 74            | 19   | 41                      | 21.6 | 33                    | 17   | 1.07     | 1, 380 | .30  |
| Community outreach                                   | 349           | 93   | 170                     | 90   | 179                   | 96   | 4.08     | 1, 375 | <.05 |
| Mean unduplicated members (in last year)             | 1011          | 3048 | 1100                    | 3566 | 921                   | 2417 | -.56     | 378    | .58  |
| Median unduplicated members (in last year)           | 276           |      | 225                     |      | 350                   |      | 2.37     |        | <.05 |
| Populations served                                   | --            | --   | --                      | --   | --                    | --   | --       | --     | --   |
| Adults                                               | 372           | 98   | 187                     | 98   | 185                   | 98   | .15      | 1, 379 | .70  |
| Older adults                                         | 249           | 66   | 124                     | 65   | 125                   | 66   | .03      | 1, 379 | .86  |
| Youth                                                | 247           | 65   | 125                     | 66   | 122                   | 65   | .06      | 1, 379 | .80  |
| Families of adult consumers                          | 128           | 34   | 56                      | 30   | 72                    | 38   | 3.16     | 1, 377 | .07  |
| Families of children/youth                           | 78            | 21   | 36                      | 19   | 42                    | 22   | .58      | 1, 378 | .45  |
| Children                                             | 43            | 11   | 16                      | 8    | 27                    | 14   | 3.24     | 1, 377 | 1.07 |

**Table 4. Financial Resources**

| Variable                                    | Total (N=380) |             | Peer-controlled (N=190) |           | Peer-directed N=(190) |             | t        | df     | p     |
|---------------------------------------------|---------------|-------------|-------------------------|-----------|-----------------------|-------------|----------|--------|-------|
|                                             | Mean          | SD          | Mean                    | SD        | Mean                  | SD          |          |        |       |
| Budget (mean)                               | \$605,563     | \$2,150,052 | \$312,382               | \$641,348 | \$893,141             | \$2,935,077 | 2.40     | 309    | <.05  |
| Budget (median)                             | \$133,000     |             | \$85,369                |           | \$186,000             |             | 3.45     |        | <.001 |
|                                             | N             | %           | N                       | %         | N                     | %           | $\chi^2$ | df     | p     |
| Majority of funding from government sources | 291           | 77          | 137                     | 72        | 154                   | 81          | 4.32     |        | <.05  |
| Governmental funding sources                | --            | --          | --                      | --        | --                    | --          | --       | --     | --    |
| State government                            | 226           | 60          | 106                     | 56        | 120                   | 64          | 2.35     | 1, 377 | .13   |
| County/local government                     | 159           | 42          | 74                      | 39        | 85                    | 45          | 1.31     | 1, 378 | .25   |
| Federal government                          | 129           | 34          | 57                      | 30        | 72                    | 39          | 2.90     | 1, 376 | .08   |

|                                  |     |    |     |    |     |    |      |        |      |
|----------------------------------|-----|----|-----|----|-----|----|------|--------|------|
| No government funding            | 45  | 12 | 30  | 16 | 15  | 8  | 5.50 | 1, 378 | <.05 |
| Medicaid/Medicare                | 29  | 8  | 12  | 6  | 17  | 9  | .99  | 1, 376 | .32  |
| Non-governmental funding sources | --  | -- | --  | -- | --  | -- | --   | --     | --   |
| Donations                        | 256 | 68 | 130 | 69 | 126 | 67 | .20  | 1, 376 | .66  |
| Fundraising                      | 215 | 57 | 106 | 56 | 109 | 58 | .14  | 1, 377 | .71  |
| Private grants                   | 131 | 35 | 64  | 34 | 67  | 35 | .08  | 1, 377 | .77  |
| Affiliate                        | 69  | 18 | 38  | 20 | 31  | 17 | .83  | 1, 375 | .36  |
| Payment for services/products    | 69  | 18 | 34  | 18 | 35  | 18 | .02  | 1, 376 | .89  |
| Member dues                      | 54  | 14 | 27  | 14 | 27  | 14 | .00  | 1, 375 | .98  |
| No private funding               | 41  | 11 | 20  | 11 | 21  | 11 | .03  | 1, 375 | .85  |

**Table 5. Products and Services**

| Variable                          | Total<br>(N=380) |    | Peer-controlled<br>(N=190) |    | Peer-directed<br>N=(190) |    | $\chi^2$ | df     | p    |
|-----------------------------------|------------------|----|----------------------------|----|--------------------------|----|----------|--------|------|
|                                   | N                | %  | N                          | %  | N                        | %  |          |        |      |
| Direct support provider primarily | 350              | 92 | 170                        | 89 | 180                      | 95 | 3.62     | 1, 380 | .057 |
| Supportive Services               | --               | -- | --                         | -- | --                       | -- | --       | --     | --   |
| Self-care/wellness classes        | 317              | 85 | 155                        | 82 | 162                      | 87 | 1.26     | 1, 375 | .26  |
| WRAP                              | 255              | 69 | 116                        | 62 | 139                      | 75 | 7.4      | 1, 372 | <.01 |
| Mutual support groups             | 304              | 82 | 146                        | 78 | 158                      | 85 | 2.99     | 1, 371 | .08  |
| Warmline/hotline                  | 121              | 33 | 56                         | 31 | 65                       | 36 | 1.33     | 1, 362 | .25  |
| Case management                   | 66               | 18 | 25                         | 14 | 41                       | 23 | 5.19     | 1, 362 | <.05 |
| Employment/Education counseling   | 182              | 45 | 79                         | 42 | 103                      | 55 | 6.20     | 1, 372 | <.05 |
| Housing                           | 78               | 21 | 33                         | 18 | 45                       | 25 | 2.27     | 1, 363 | .13  |
| Legal assistance                  | 119              | 32 | 56                         | 30 | 63                       | 34 | .73      | 1, 368 | .39  |
| Advocacy                          |                  |    |                            |    |                          |    |          |        |      |
| Any advocacy                      | 350              | 92 | 177                        | 93 | 173                      | 91 | .58      | 1, 380 | .45  |
| Anti-stigma                       | 313              | 84 | 156                        | 83 | 157                      | 84 | .07      | 1, 373 | .80  |
| Demonstrations/protests           | 150              | 41 | 80                         | 43 | 70                       | 38 | .87      | 1, 369 | .35  |
| Letter-writing                    | 283              | 76 | 142                        | 76 | 141                      | 75 | .01      | 1, 374 | .90  |
| Participate on committees         | 281              | 75 | 132                        | 70 | 149                      | 80 | 4.47     | 1, 375 | <.05 |
| Evaluation activities             | --               | -- | --                         | -- | --                       | -- | --       | --     | --   |
| Program has been evaluated        | 199              | 53 | 88                         | 47 | 111                      | 59 | 5.65     | 1, 376 | <.05 |
| Conduct research/evaluation/QI    | 139              | 37 | 62                         | 33 | 77                       | 4  | 2.69     | 1, 377 | .10  |
| Research ranked first priority    | 26               | 9  | 13                         | 9  | 13                       | 9  | .008     | 1, 289 | .93  |
